# Supplementary material for: Interaction between Enrofloxacin and Three Essential Oils (Cinnamon Bark, Clove Bud and Lavender Flower)—A Study on Multidrug-Resistant Escherichia coli Strains Isolated from 1-Day-Old Broiler Chickens
Source: MDPI journal article supplement (doi:10.3390/ijms25105220), 2024-05-10
Supplement: s1 [file s1]

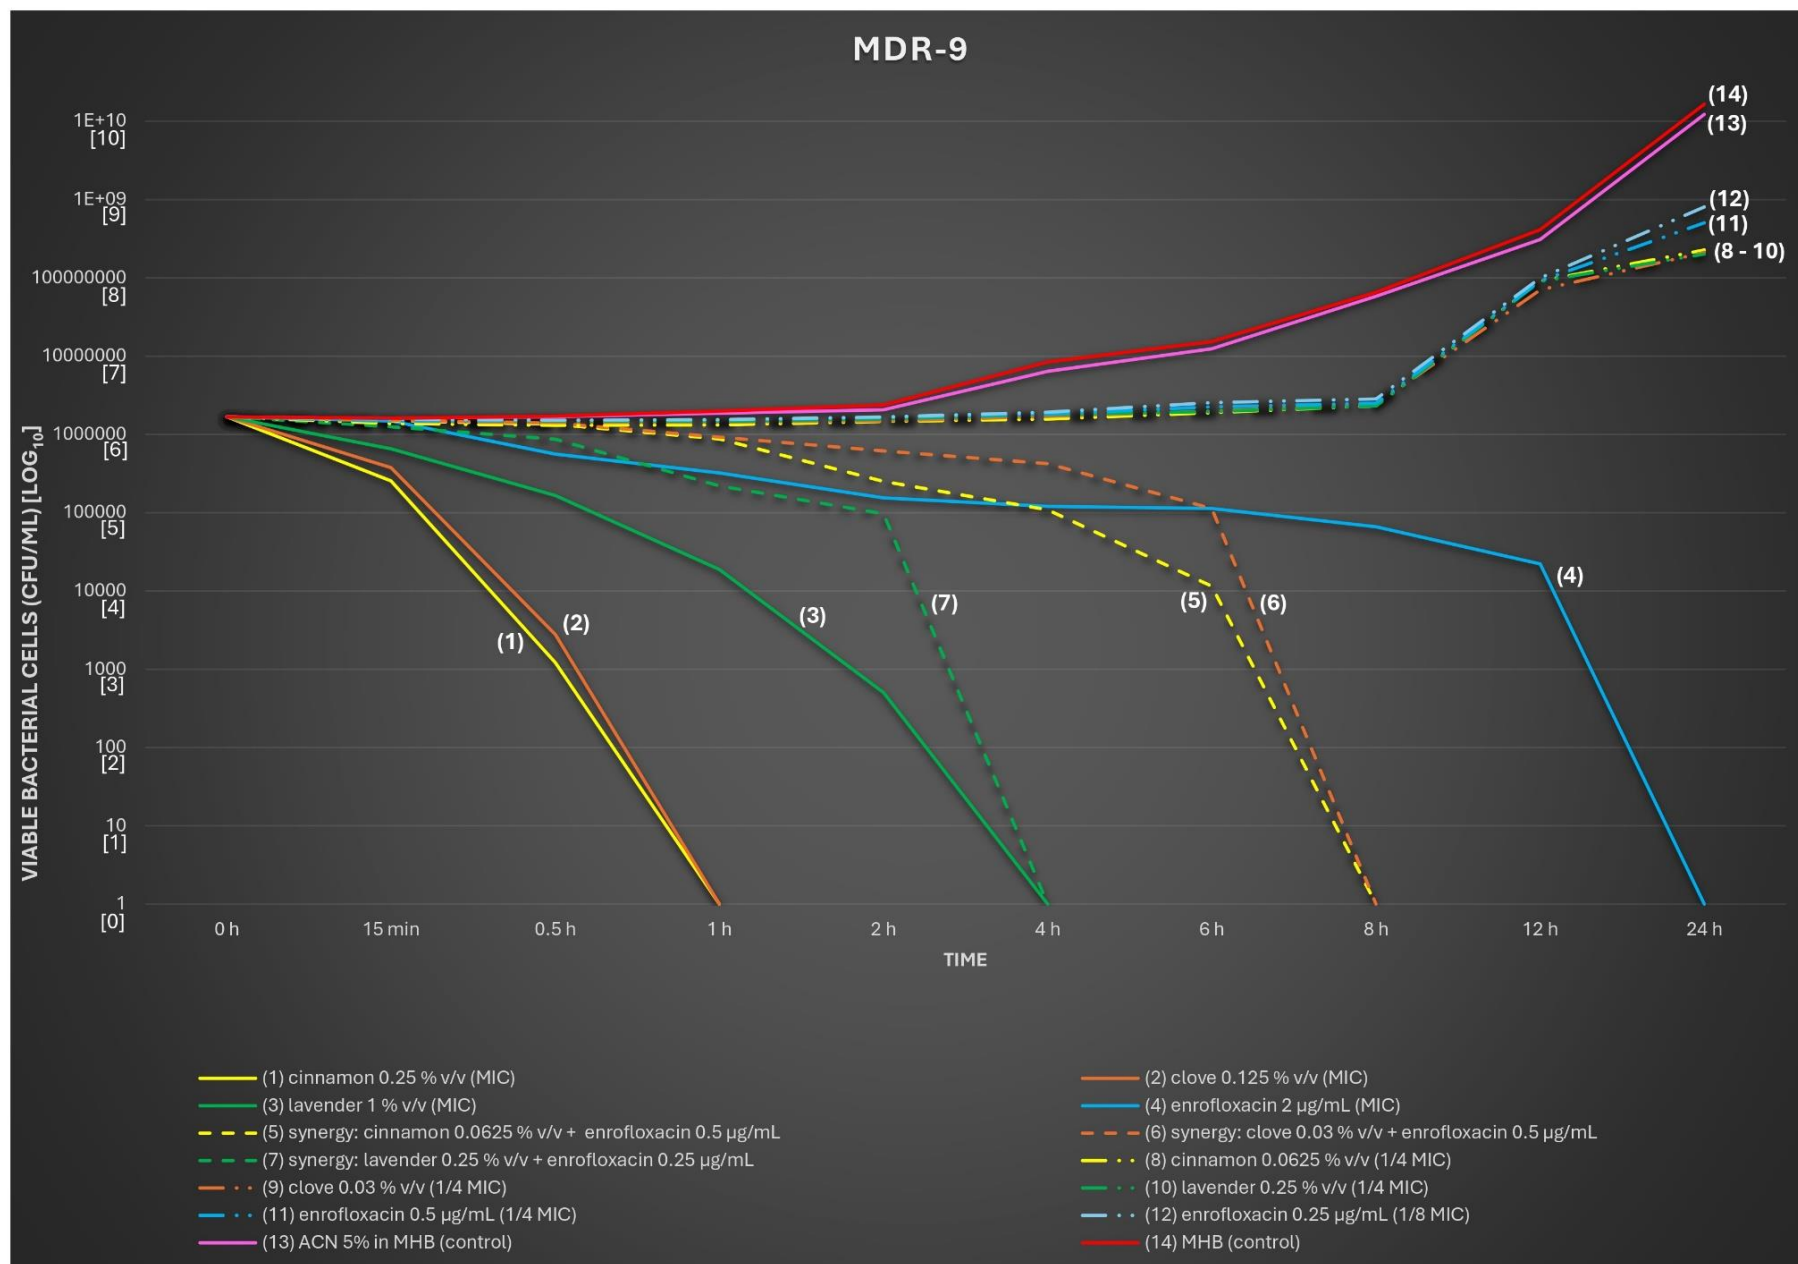

Figure S3 Time-kill analysis of cinnamon bark, clove bud and lavender flower essential oils administered alone and in the synergistic combination with enrofloxacin (*Escherichia coli* MDR-9 strain)

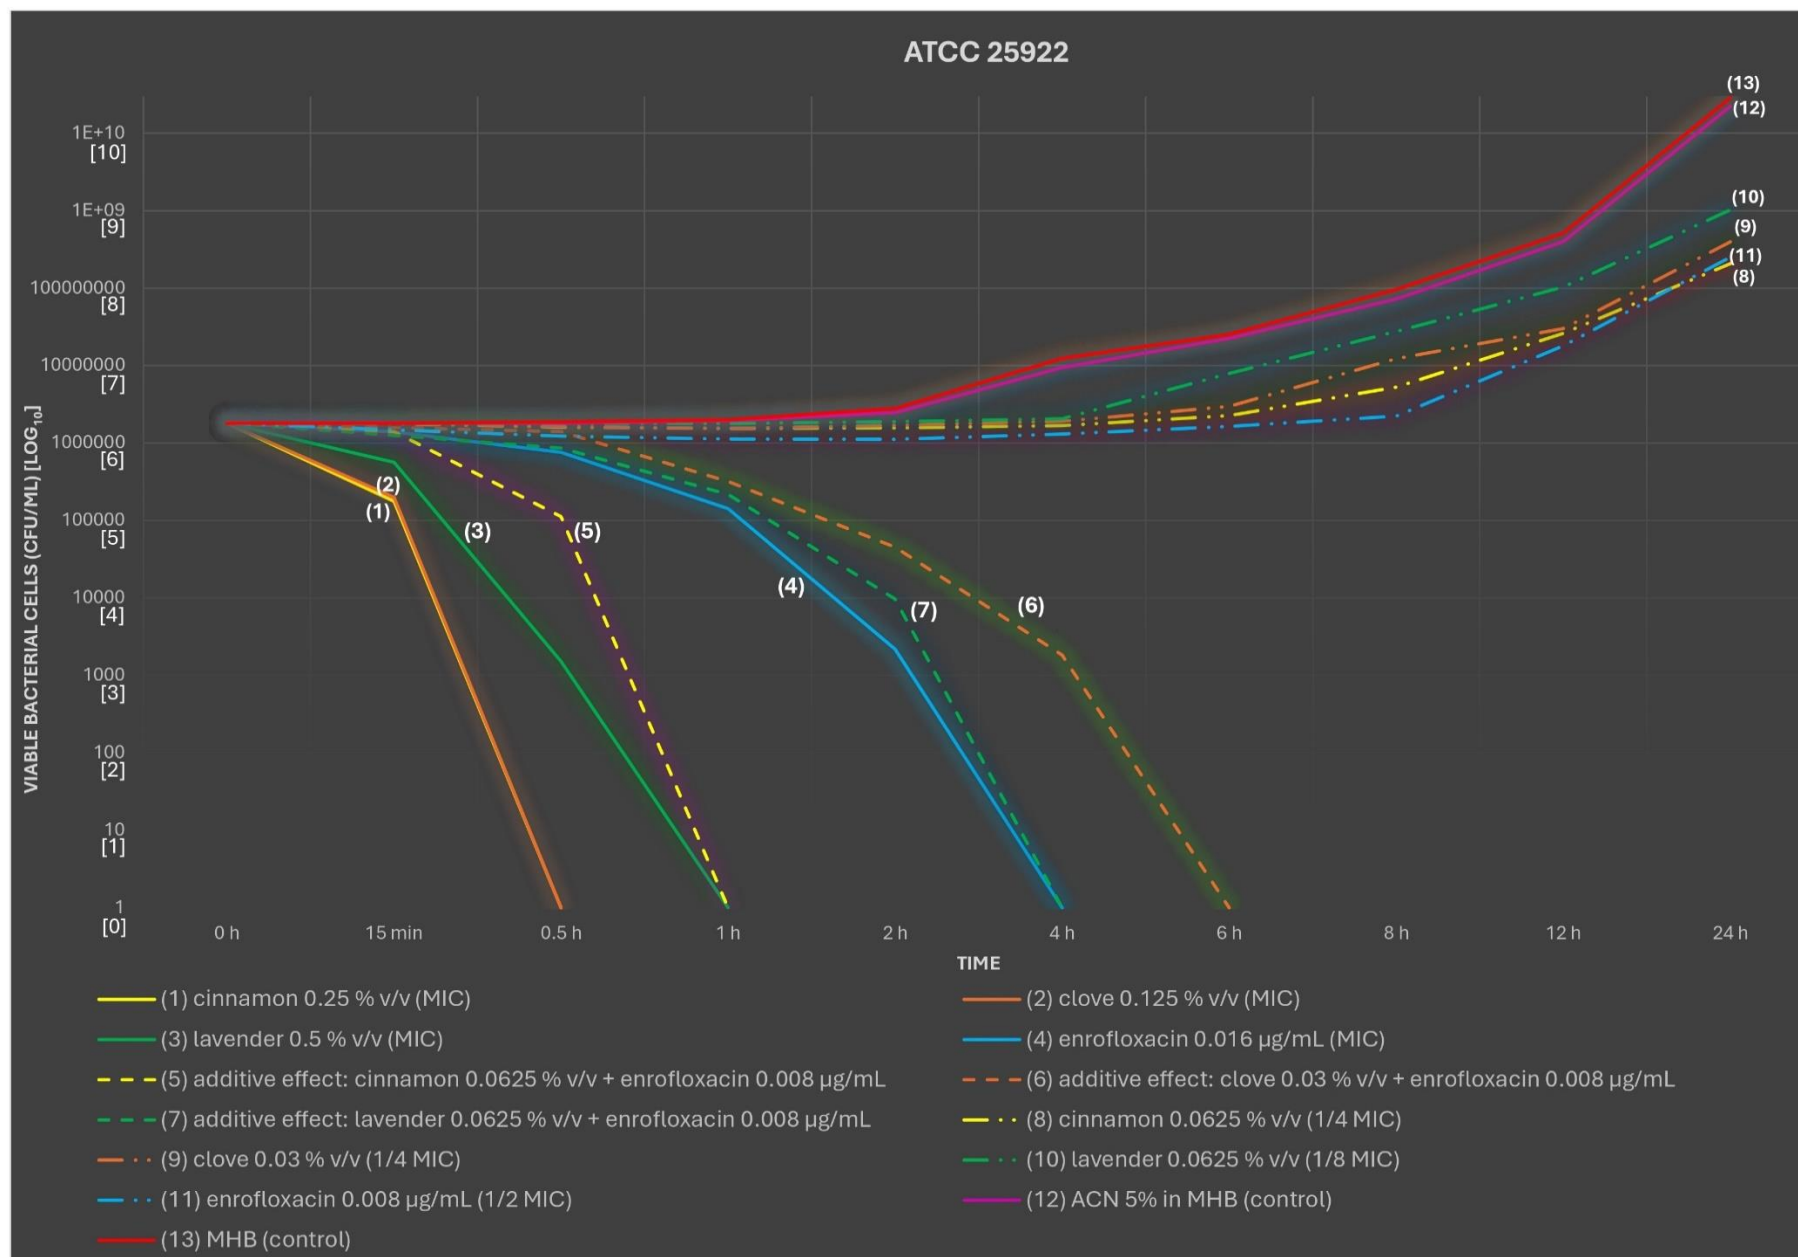

Figure S4 Time-kill analysis of cinnamon bark, clove bud and lavender flower essential oils administered alone and in combination with enrofloxacin (additive effect; *Escherichia coli* ATCC 25922 reference strain)
