# Supplementary material for: Interaction between Enrofloxacin and Three Essential Oils (Cinnamon Bark, Clove Bud and Lavender Flower)—A Study on Multidrug-Resistant Escherichia coli Strains Isolated from 1-Day-Old Broiler Chickens
Source: MDPI journal article supplement (doi:10.3390/ijms25105220), 2024-05-10
Supplement: s1 [file s1]

Table S1. Drug susceptibility of selected isolates of *Escherichia coli* and the ATCC 25922 reference strain (source: official test reports; disk-diffusion method)

| Nº  | <i>Escherichia coli</i> | antimicrobial agent |     |     |     |    |    |     |    |    |
|-----|-------------------------|---------------------|-----|-----|-----|----|----|-----|----|----|
|     |                         | AMX                 | AMC | ENR | SXT | DO | OT | FFC | CT | LS |
| 1.  | MDR-1                   | R                   | R   | R   | R   | R  | R  | R   | S  | R  |
| 2.  | MDR-2                   | R                   | S   | R   | R   | R  | R  | R   | S  | R  |
| 3.  | MDR-3                   | R                   | R   | R   | R   | R  | R  | R   | S  | R  |
| 4.  | MDR-4                   | R                   | R   | R   | R   | R  | R  | S   | S  | R  |
| 5.  | MDR-5                   | R                   | R   | R   | R   | R  | R  | S   | S  | R  |
| 6.  | MDR-6                   | R                   | S   | R   | R   | R  | R  | R   | S  | S  |
| 7.  | MDR-7                   | R                   | S   | R   | R   | R  | R  | S   | S  | R  |
| 8.  | MDR-8                   | R                   | S   | R   | R   | R  | R  | S   | S  | S  |
| 9.  | MDR-9                   | R                   | S   | R   | R   | R  | R  | S   | S  | S  |
| 10. | MDR-10                  | R                   | S   | R   | R   | R  | R  | S   | S  | S  |
| 11. | SDR-1                   | R                   | S   | I   | I   | R  | R  | S   | S  | S  |
| 12. | SDR-2                   | R                   | S   | I   | S   | I  | R  | S   | S  | S  |
| 13. | SDR-3                   | R                   | S   | I   | R   | S  | S  | S   | S  | S  |
| 14. | SENS-1                  | S                   | S   | S   | S   | S  | S  | S   | S  | S  |
| 15. | SENS-2                  | S                   | S   | S   | S   | S  | S  | S   | S  | S  |
| 16. | SENS-3                  | S                   | S   | S   | S   | S  | S  | S   | S  | S  |
| 17. | ATCC 25922              | S                   | S   | S   | S   | S  | S  | S   | S  | S  |

R resistant
 I intermediate
 S susceptible

AMX – amoxicillin

AMC – amoxicillin/clavulanic acid

ENR – enrofloxacin

SXT – sulfamethoxazole/trimethoprim

DO – doxycycline

OT – oxytetracycline

FFC – florfenicol

CT – colistin

LS – lincomycin/spectinomycin
